# Supplementary material for: Performance of models to predict hepatocellular carcinoma risk among UK patients with cirrhosis and cured HCV infection
Source: PubMed Central journal article supplement — JHEP Rep. 2021 Oct 7;3(6):100384. doi: 10.1016/j.jhepr.2021.100384 (PMC8585647; doi:10.1016/j.jhepr.2021.100384), 2021-10-07
Supplement: mmc1.pdf [file mmc1.pdf]

# **Performance of models to predict hepatocellular carcinoma risk among UK patients with cirrhosis and cured hepatitis C infection**

Hamish Innes, Peter Jepsen, Scott McDonald, John Dillon, Victoria Hamill, Alan Yeung, Jennifer Benselin, April Went, Andrew Fraser, Andrew Bathgate, M. Azim Ansari, Stephen T Barclay, David Goldberg, Peter C Hayes, Philip Johnson, Eleanor Barnes, William Irving, Sharon Hutchinson, Indra Neil Guha

## Table of contents

|                  |    |
|------------------|----|
| Appendix A ..... | 2  |
| Fig. S1.....     | 3  |
| Fig. S2.....     | 4  |
| Fig. S3.....     | 5  |
| Fig. S4.....     | 6  |
| Fig. S5.....     | 7  |
| Fig. S6.....     | 8  |
| Table S1.....    | 9  |
| Table S2.....    | 10 |
| Table S3.....    | 11 |

## APPENDIX A

### PROVENANCE OF HCC PREDICTION MODELS ASSESSED IN THIS STUDY

The non-genetic HCC prediction models assessed were developed from patients in China (aMAP), Canada (THRI), US (VHA model), and France (ANRS CO12 model) (Table 1). The number of patients in the model development dataset varied 10-fold; from 720 in the ANRS CO12 model, to 7689 for the US VHA model. The aMAP model was distinct insofar as the development dataset was made up entirely of hepatitis B patients who were mostly without cirrhosis (81% pre-cirrhotic). The four models use overlapping prognostic factors, with age, gender, platelet count and albumin all included in at least 2/4 models. Reported discrimination performance ranged from C-index 0.72 (ANRS-CO12 model) to C-index 0.82 (aMAP).

The genetic risk models were based on loci associated with increased liver steatosis. Specifically: rs738409:G in *PNPLA3* (both models); rs58542926:T in *TM6SF2* (both models); rs641837:T in *MBOAT7* (Dongiovanni et al model); rs1260326:T in *GCKR* (Dongiovanni et al model) and rs72613567:T in *HSD17B13* (Gellert-Kristensen et al model). Variants were weighted differently in each model (Table S1). Dongiovanni et al score used a data driven approach, where each variant was weighted according to the magnitude of association with liver fat content in the Dallas Heart study. By contrast, the Gellert-Kristensen et al score assumed nominally equal weightings for all variants. C-index values for discrimination were not reported by the authors of these genetic models.

**Fig. S1. Derivation of final sample.**

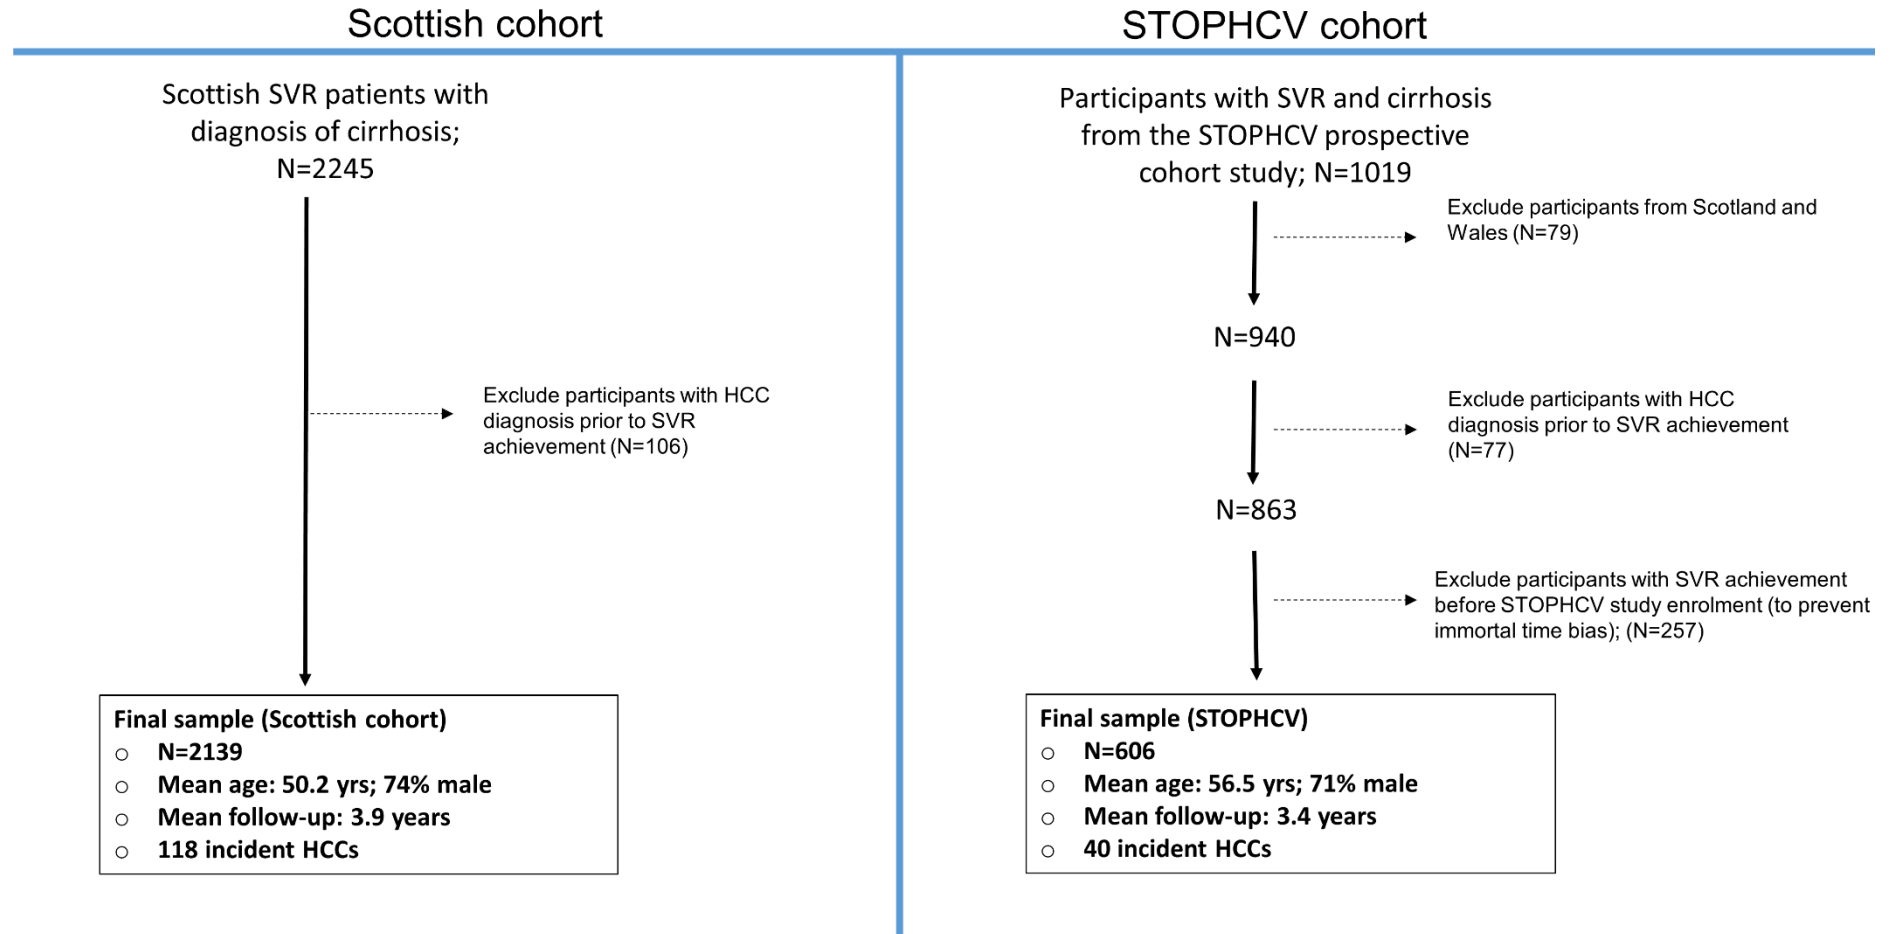

**Fig. S2. Cumulative incidence (CI) of HCC according to predicted HCC risk in Scottish cohort.**

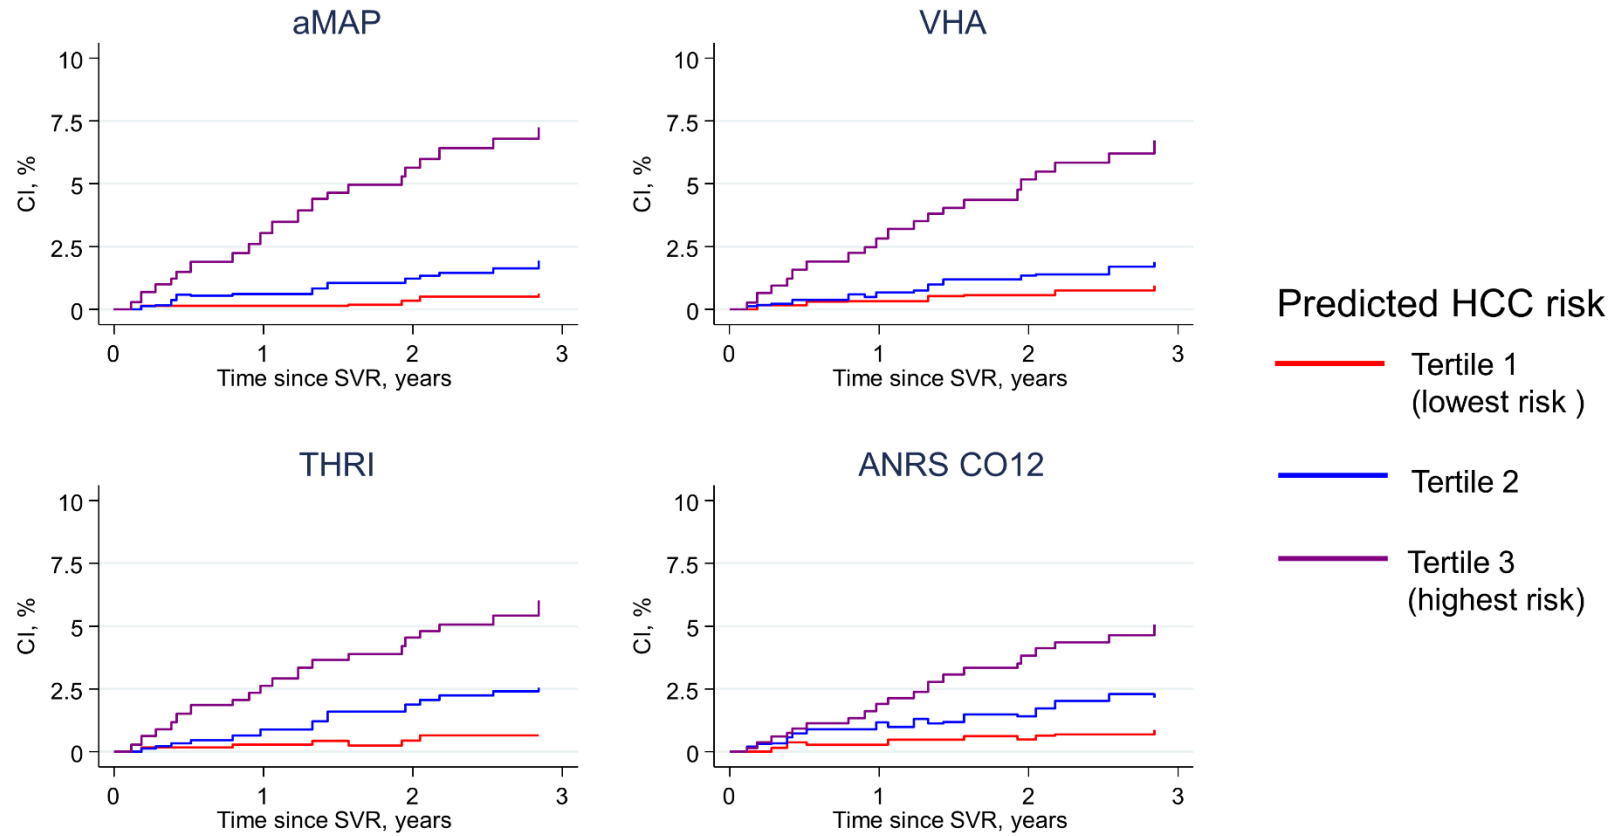

Risk tertiles refer to three groups: a) those whose prediction is in the 33<sup>rd</sup> percentile or lower; b) those in the 33<sup>rd</sup>-67<sup>th</sup> percentile and c) those in the 68<sup>th</sup>-100<sup>th</sup> percentile. Cumulative incidence curves are generated non-parametrically with non-HCC mortality treated as a competing risk event.

**Fig. S3. Cumulative incidence (CI) of HCC according to predicted HCC risk in STOP-HCV cohort.**

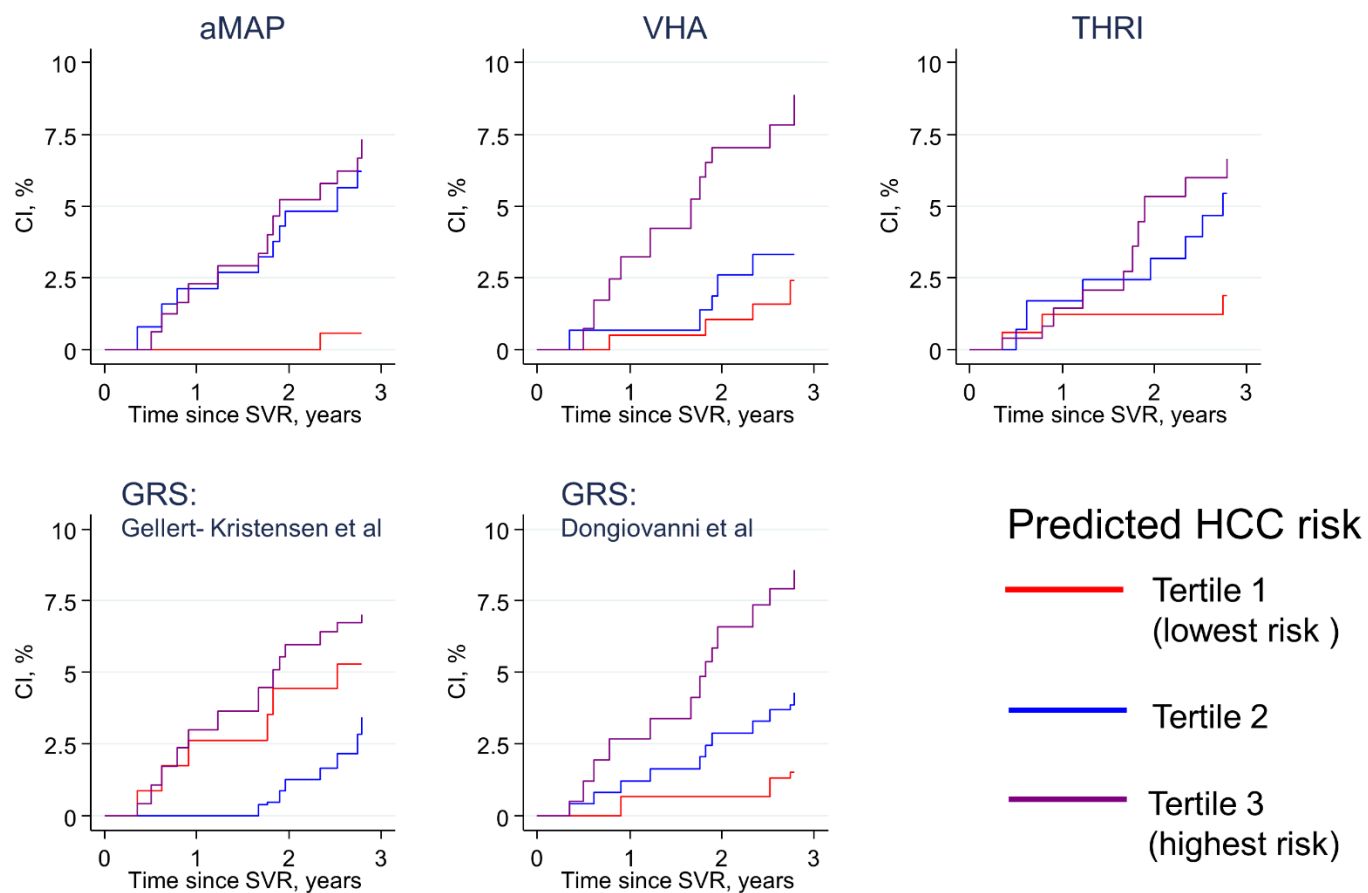

GRS=Genetic Risk Score. Risk tertiles refer to three groups: a) those whose prediction is in the 33<sup>rd</sup> percentile or lower; b) those in the 33<sup>rd</sup>-67<sup>th</sup> percentile and c) those in the 68<sup>th</sup>-100<sup>th</sup> percentile. Cumulative incidence curves are generated non-parametrically with non-HCC mortality treated as a competing risk event.

**Fig. S4. Concordance index (C-index) in Scottish cohort according to subgroup.**

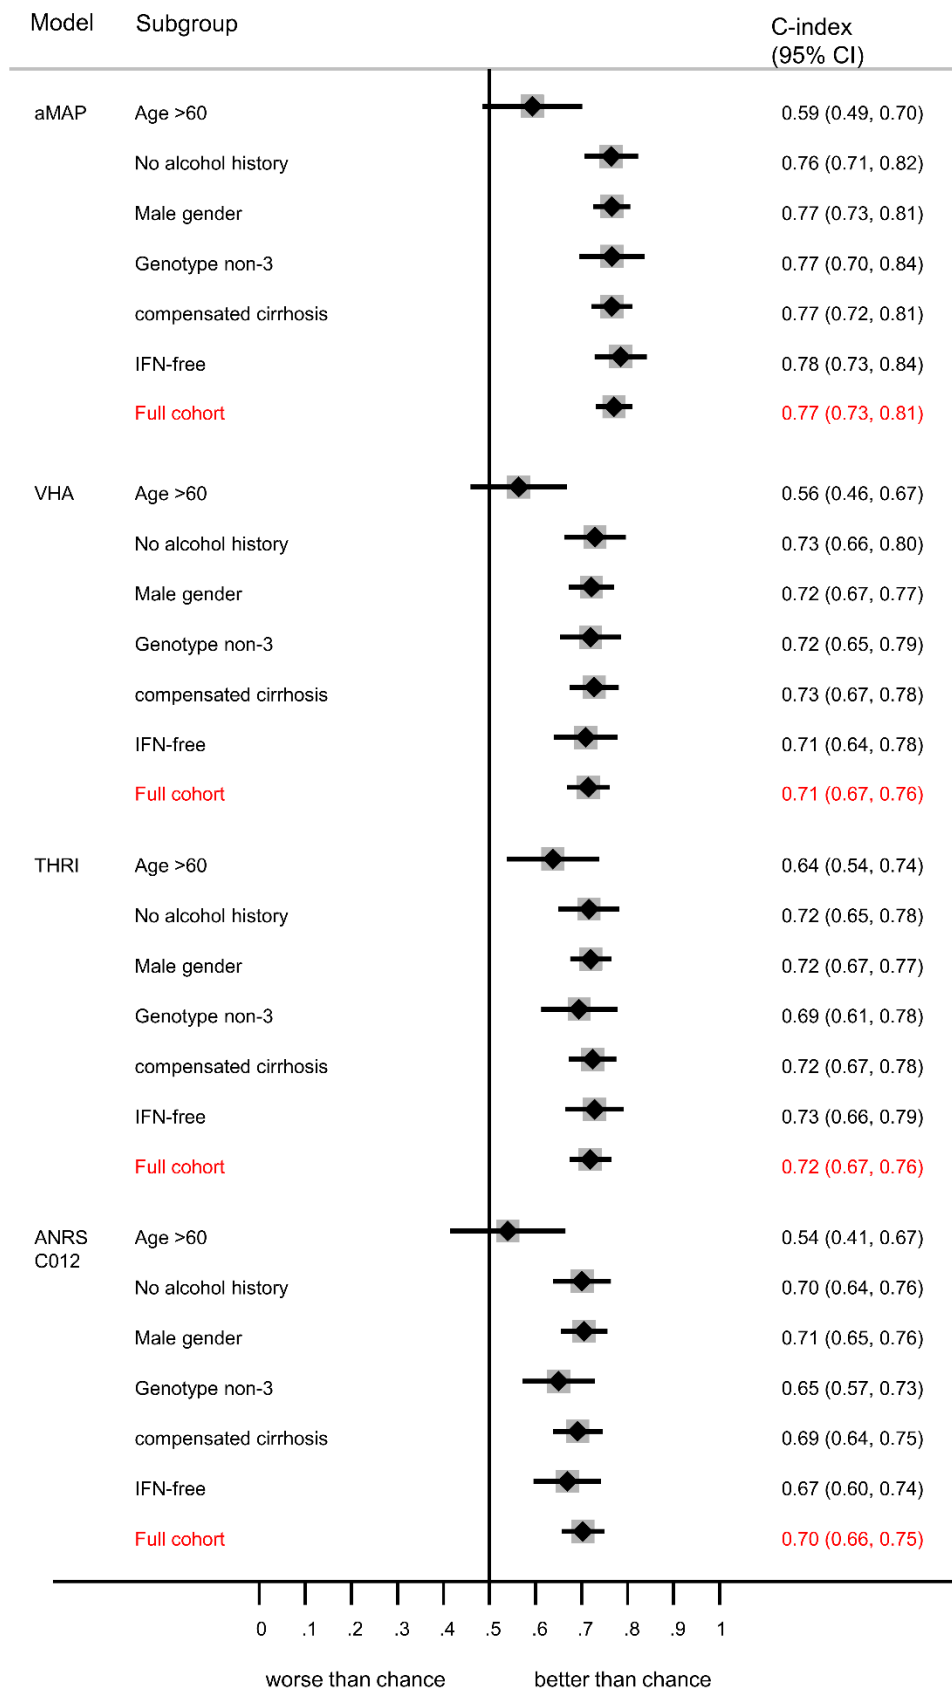

**Fig. S5. Concordance index (C-index) in STOP-HCV cohort according to subgroup.**

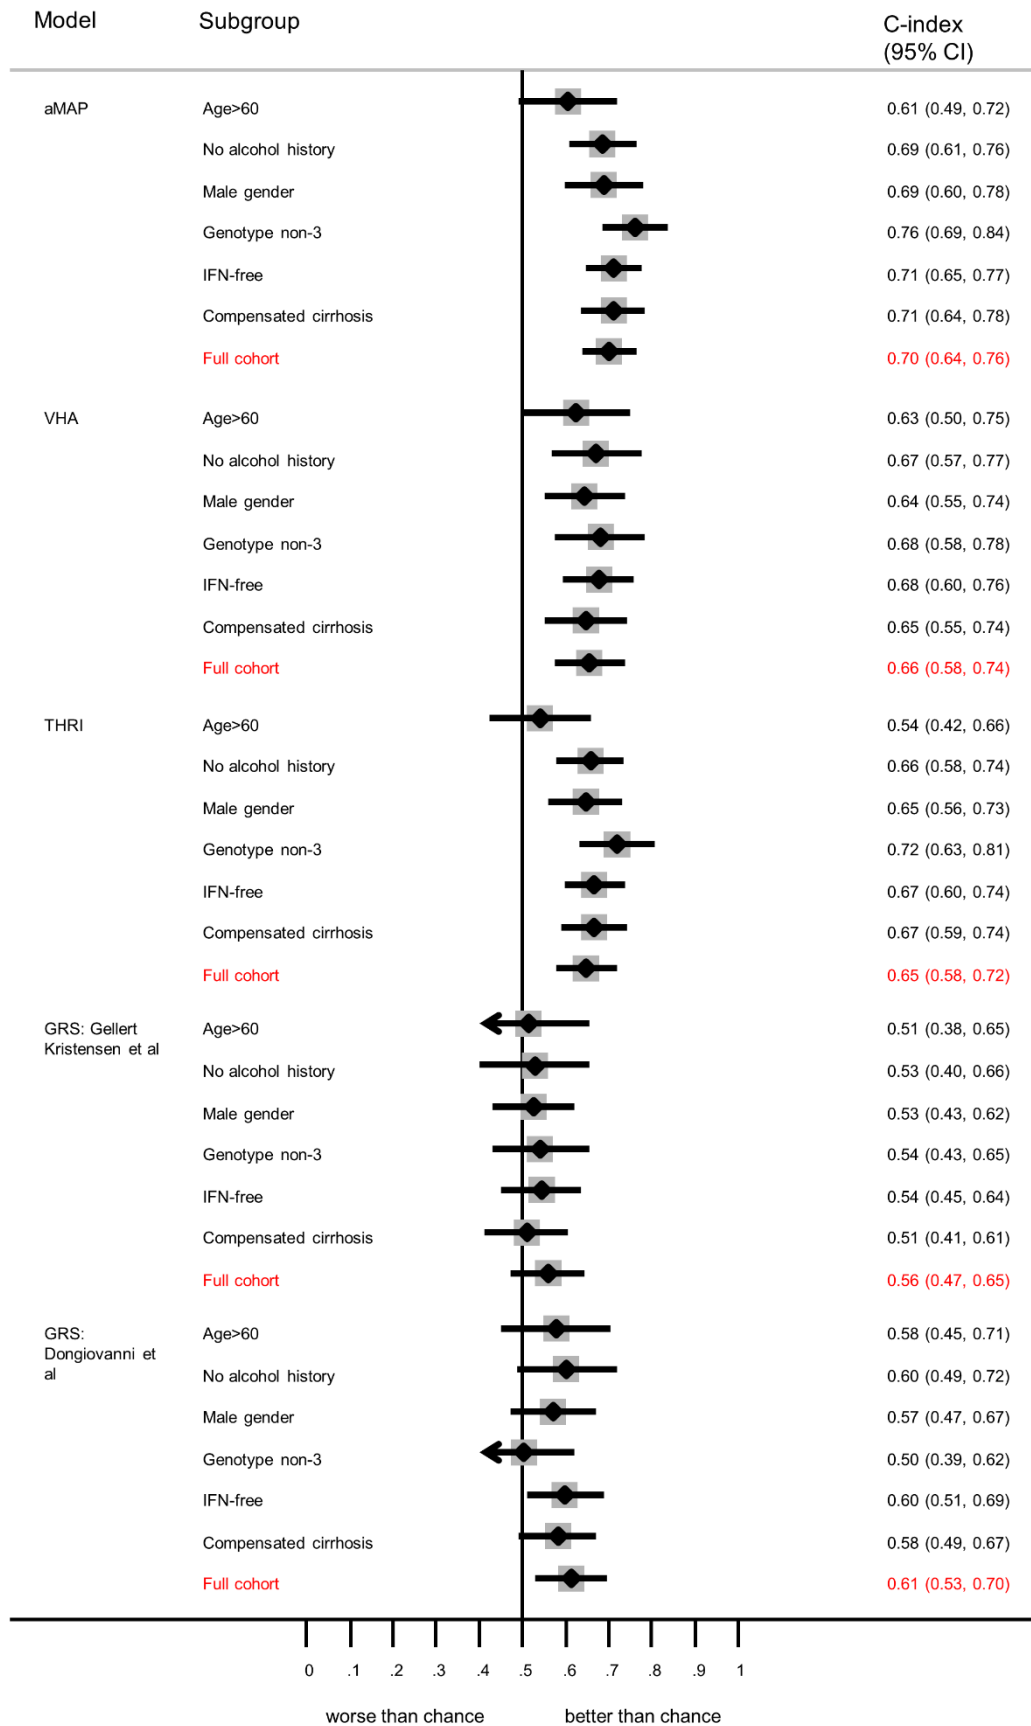

Fig. S6. Observed and predicted 3-year HCC probability in the Scottish and STOP-HCV cohort.

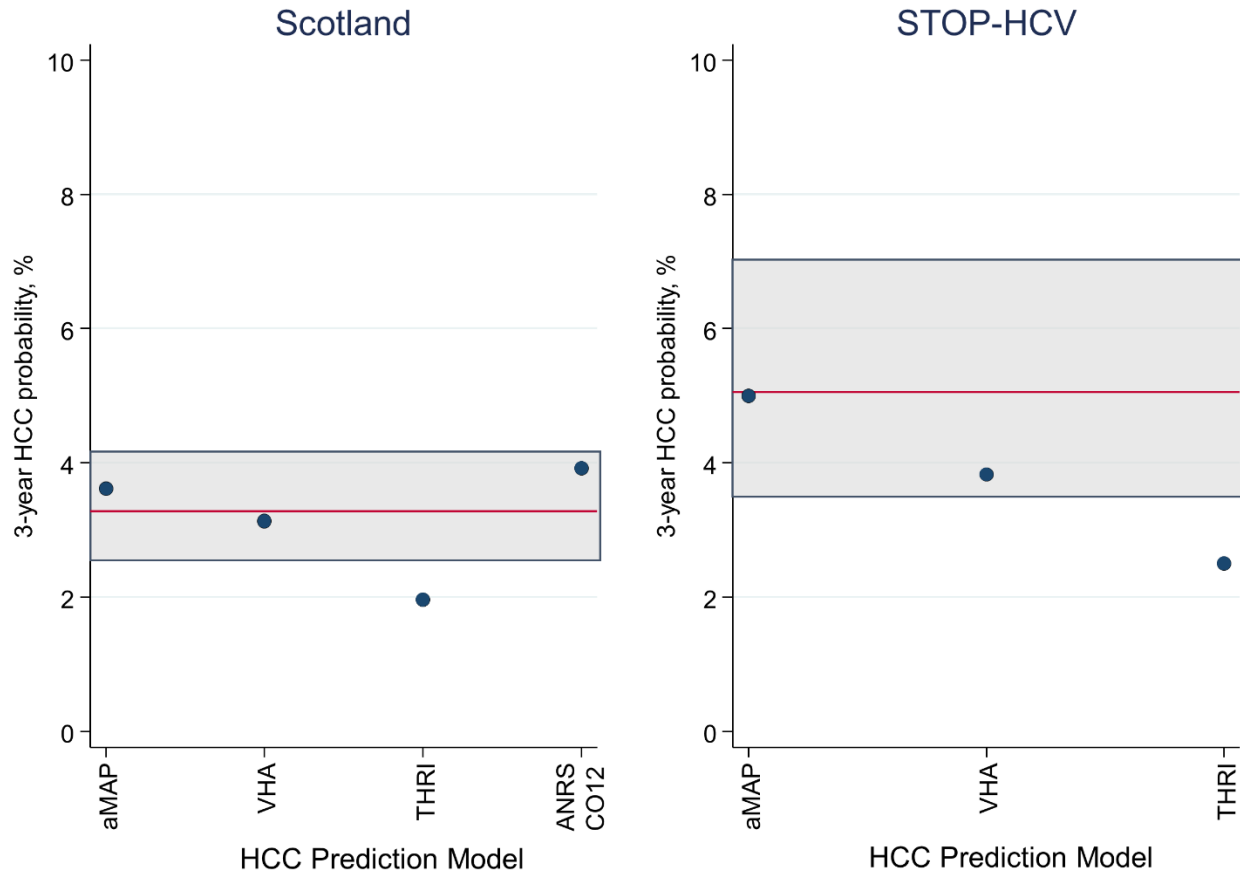

The probability predicted by each model is indicated by the blue circles. The observed 3-year probability of HCC and the 95% uncertainty interval is indicated by the red line and the grey box, respectively.



Table S1: Overview of the non-genetic HCC models assessed in this study.

| HCC Model                     | Year published | Journal    | Country | Setting      | Characteristics of the development cohort |                      |              |                            |                      |                  |                 |                                                 |                                              |
|-------------------------------|----------------|------------|---------|--------------|-------------------------------------------|----------------------|--------------|----------------------------|----------------------|------------------|-----------------|-------------------------------------------------|----------------------------------------------|
|                               |                |            |         |              | Sample size                               | Mean age at baseline | HCV GT non-3 | Mean duration of follow-up | Number of HCC events | % with cirrhosis | % HCV Aetiology | Prognostic factors selected                     | Discrimination Performance (Harrell C-index) |
| aMAP                          | 2020           | J hepatol  | China   | Liver clinic | 3688                                      | 38 YEARS             | NA           | 3.6 years                  | 95                   | 19%              | 0% (100% HBV)   | age, gender, albumin, bilirubin, platelet count | 0.82                                         |
| VA cirrhosis SVR model        | 2018           | J hepatol  | US      | Liver clinic | 7689                                      | 61.5 YEARS           | 90%          | 2.5 years                  | 344                  | 100%             | 100%            | Age; race; platelet count; albumin; AST; ALT    | 0.74‡                                        |
| Toronto HCC Risk Index (THRI) | 2018           | J hepatol  | Canada  | Liver clinic | 2079                                      | 53.9 YEARS           | NK           | ~6 years**                 | 226                  | 100%             | 42.5%           | Age, etiology, gender, platelet count           | 0.74                                         |
| ANRS CO12 CirVir              | 2017           | Hepatology | France  | Liver clinic | 720                                       | 56.2 YEARS           | 86%          | 4.3 years                  | 103                  | 100%             | 100%            | age, alcohol, platelet count, GGT, SVR          | 0.72                                         |

Development cohort refers to the dataset used to "train" the model

\*\* this is the mean duration of follow-up for non-HCC cases. The mean follow-up duration for the entire cohort was not indicated in the original paper

‡ Gonen and Heller k-statistic as opposed to Harrell C-index.

Table S2. HCC genetic risk models assessed in this study: overview

| Genetic Risk Model                   | Year published | Journal    | Genetic risk variants selected                       | Method of variant selection                                               | Weighting                                                                         | Association with incident HCC                                                                                                                                                                                                                                                                           | C-index      |
|--------------------------------------|----------------|------------|------------------------------------------------------|---------------------------------------------------------------------------|-----------------------------------------------------------------------------------|---------------------------------------------------------------------------------------------------------------------------------------------------------------------------------------------------------------------------------------------------------------------------------------------------------|--------------|
| GRS#1<br>Dongiovanni, et al[1]       | 2018           | Hepatology | rs738409_G; rs58542926_T;<br>rs641738_T; rs1260326_T | Variants selected for known association with steatosis, cirrhosis and HCC | Weighted according to association with liver fat in the Dallas Heart study.       | Degasperi et al [2] indicate that, among patients with HCV cirrhosis, individuals with score value >0.597 had more than twice the risk of HCC occurrence (HR:2.30;95% CI: 1.03-5.11; p=0.04) versus individuals with a score<=0.597.                                                                    | Not reported |
| GRS#2: Gellert- Kristensen, et al[3] | 2020           | Hepatology | rs738409_G; rs58542926_T;<br>rs72613567_T            | Variants selected for known association with steatosis                    | Value of 1 assigned to each risk variant - all variants are thus weighted equally | Gellert-Kristensen et al [3] indicate that the score is significantly associated with HCC incidence in participants of the UKBiobank and Copenhagen general population studies. Individuals with a score of 5 or 6 had 29 (95%CI: 17-51) times the odds of HCC versus individuals with a score of zero. | Not reported |

[1] Dongiovanni P, Stender S, Pietrelli A, Mancina RM, Cespiati A, Petta S, et al. Causal relationship of hepatic fat with liver damage and insulin resistance in non-alcoholic fatty liver. *Journal of Internal Medicine*. 2018;283:356-370.

[2] Degasperi E, Galmozzi E, Pelusi S, D'ambrosio R, Soffredini R, Borghi M. et al. Hepatic fat – genetic risk score predicts hepatocellular carcinoma in HCV cirrhotic patients treated

[3] Gellert-Kristensen H, Richardson TG, Davey-Smith G, Nordestgaard BG, Tybjaerg-Hansen A, Stender S. Combined effect of PNPLA3, TM6SF2 and HSD17B13 variants on risk of

Table S3: Discriminative ability of HCC prediction models in Scottish and STOPHCV cohorts, in terms of the Concordance index.

| C Index                | HCC prediction model |                     |                     |                     |                        |                     |
|------------------------|----------------------|---------------------|---------------------|---------------------|------------------------|---------------------|
|                        | aMAP                 | VHA                 | THRI                | ANRS C012           | Gellert-Kristensen GRS | Dongiovanni GRS     |
| <b>Scottish cohort</b> |                      |                     |                     |                     |                        |                     |
| Wolbers C-index        | 0.771 (0.731-0.810)  | 0.715 (0.668-0.761) | 0.719 (0.673-0.764) | 0.703 (0.656-0.749) | NA                     | NA                  |
| Harrell C-index        | 0.783 (0.743-0.823)  | 0.722 (0.674-0.771) | 0.723 (0.676-0.770) | 0.711 (0.662-0.759) | NA                     | NA                  |
| <b>STOPHCV cohort</b>  |                      |                     |                     |                     |                        |                     |
| Wolbers C-index        | 0.701 (0.638-0.764)  | 0.657 (0.576-0.737) | 0.648 (0.577-0.718) | NA                  | 0.559 (0.473-0.645)    | 0.613 (0.530-0.695) |
| Harrell C-index        | 0.708 (0.645-0.771)  | 0.662 (0.582-0.742) | 0.649 (0.579-0.719) | NA                  | 0.560 (0.473-0.648)    | 0.617 (0.534-0.699) |
